# Supplementary material for: The type of the functional cardiovascular response to upright posture is associated with arterial stiffness: a cross-sectional study in 470 volunteers
Source: Springer Nature journal article supplement (doi:10.1186/s12872-016-0281-8), 2016-05-23

**Additional file 2. Magnitude of changes in systemic vascular resistance and cardiac index in response to upright posture.** Changes in systemic vascular resistance index (A) and cardiac index (B) from the average of the 5th minute of the recording (supine) to the average of the 8<sup>th</sup> minute of the recording (upright) in the constrictor, intermediate, and sustainer phenotypes. Bar graphs depict mean and whiskers 95% confidence interval of the mean.

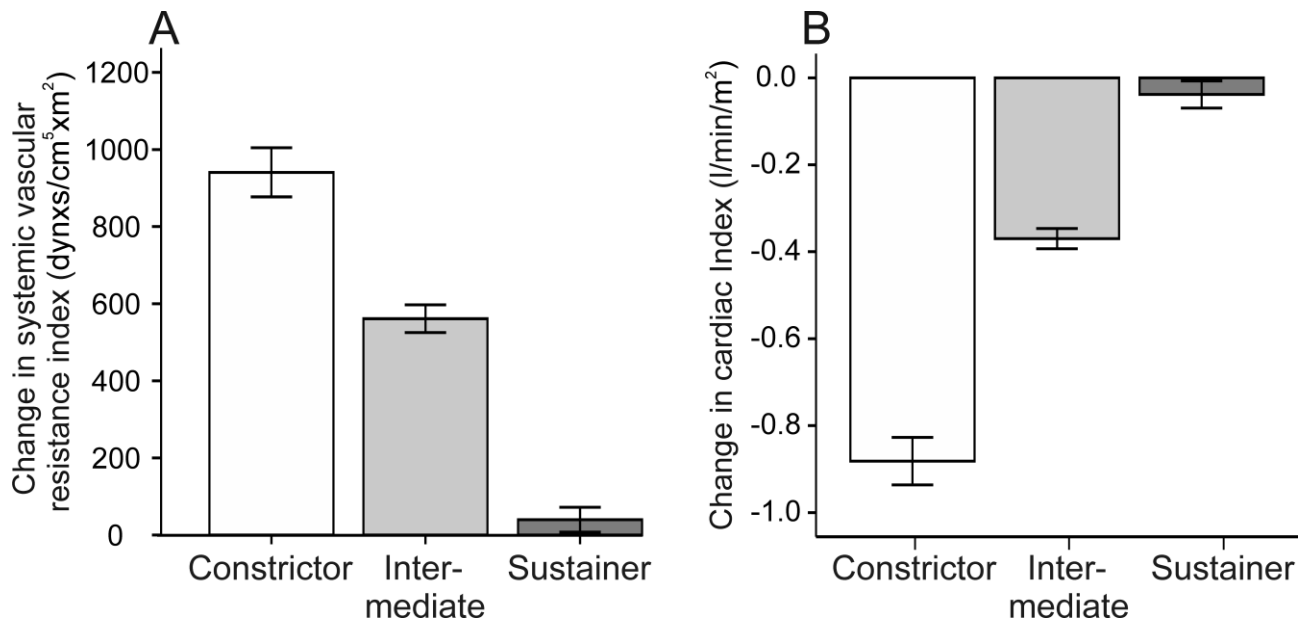

Supplement: MOESM2 [file 10190466]
