# Supplementary material for: The type of the functional cardiovascular response to upright posture is associated with arterial stiffness: a cross-sectional study in 470 volunteers
Source: Springer Nature journal article supplement (doi:10.1186/s12872-016-0281-8), 2016-05-23
Supplement: MOESM3 [file 10190466]

**Additional File 3. Supine and upright haemodynamics in the three phenotypes.**

| Variable                                              | Constrictor      | Intermediate      | Sustainer          | p-value |
|-------------------------------------------------------|------------------|-------------------|--------------------|---------|
| Number of subjects                                    | 109              | 139               | 222                |         |
| Supine radial systolic BP (mmHg)                      | 127 (113-142)    | 130 (117-144)     | 135 (123-146)*†    | 0.004   |
| Upright radial systolic BP (mmHg)                     | 128 (112-144)    | 130 (119-146)     | 129 (116-140)      | 0.202   |
| Supine radial diastolic BP (mmHg)                     | 70 (65-83)       | 77 (67-84)        | 79 (71-89)*†       | <0.001  |
| Upright radial diastolic BP (mmHg)                    | 78 (68-89)       | 84 (77-94)*       | 82 (73-92)         | 0.017   |
| Supine heart rate                                     | 64 (59-69)       | 62 (57-69)        | 60 (56-67)*        | 0.018   |
| Upright heart rate                                    | 73 (66-79)       | 74 (66-82)        | 76 (71-83)*        | 0.013   |
| Supine stroke index (ml/min/m <sup>2</sup> )          | 50 (47-55)       | 45 (41-49)*       | 44 (41-47)*        | <0.001  |
| Upright stroke index (ml/min/m <sup>2</sup> )         | 32 (30-36)       | 33 (30-38)        | 35 (32-38)*†       | <0.001  |
| Supine cardiac index (l/min/m <sup>2</sup> )          | 3.25 (3.00-3.60) | 2.80 (2.55-3.10)* | 2.70 (2.40-3.05)*† | <0.001  |
| Upright cardiac index (l/min/m <sup>2</sup> )         | 2.32 (2.10-2.55) | 2.45 (2.28-2.70)* | 2.65 (2.35-2.95)*† | <0.001  |
| Supine SVRI (dyn*s/cm <sup>5</sup> *m <sup>2</sup> )  | 2104 (1800-2495) | 2550 (2152-2920)* | 2824 (2451-3125)*† | <0.001  |
| Upright SVRI (dyn*s/cm <sup>5</sup> *m <sup>2</sup> ) | 3063 (2577-3538) | 3103 (2679-3505)  | 2808 (2454-3200)*† | <0.001  |

Values are median (25<sup>th</sup> to 75<sup>th</sup> percentile); BP, blood pressure; SVRI, systemic vascular resistance index;

\*p<0.05 when compared with constrictor phenotype; †p<0.05 when compared with intermediate phenotype.
