# Supplementary material for: The type of the functional cardiovascular response to upright posture is associated with arterial stiffness: a cross-sectional study in 470 volunteers
Source: Springer Nature journal article supplement (doi:10.1186/s12872-016-0281-8), 2016-05-23

**Additional file 4. Blood pressure in response to head-up tilt.** Radial systolic and diastolic blood pressure during the measurement protocol, respectively, in the constrictor (A, D), intermediate (B, E), and sustainer phenotypes (C, F). Mean (bold line) and individual curves (grey lines).

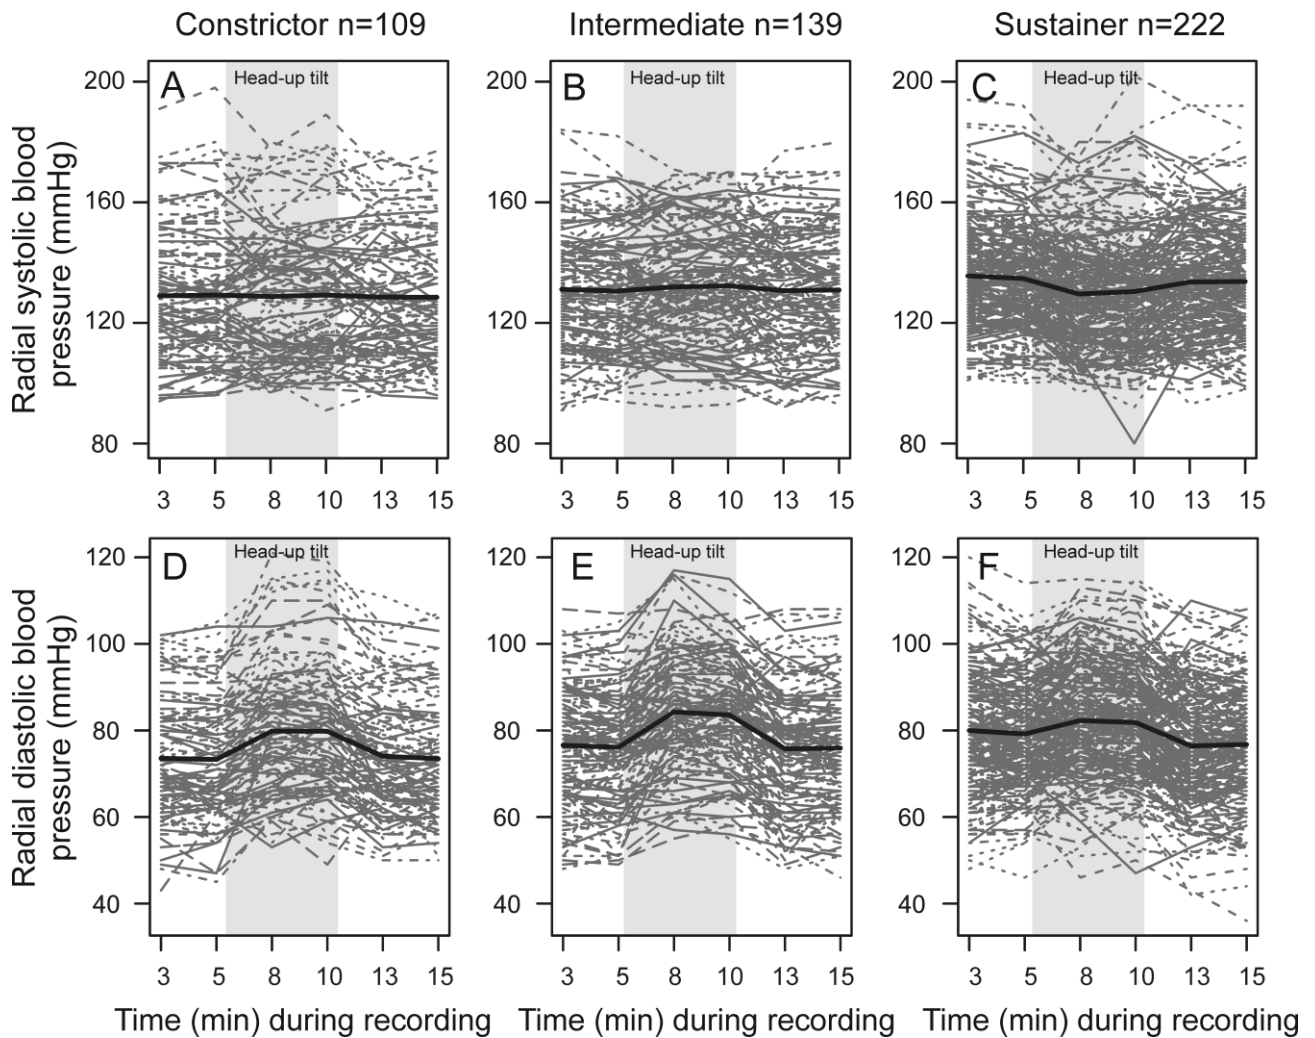

Supplement: MOESM4 [file 10190466]
