# Supplementary material for: The type of the functional cardiovascular response to upright posture is associated with arterial stiffness: a cross-sectional study in 470 volunteers
Source: Springer Nature journal article supplement (doi:10.1186/s12872-016-0281-8), 2016-05-23
Supplement: MOESM5 [file 10190466]

**Additional file 5. Analysis of explanatory factors for logarithmically transformed supine pulse wave velocity in multivariate analysis using continuous variables without categorization.** Pulse wave velocity was logarithmically transformed for the analysis due to skewed distribution. The change in systemic vascular resistance and the change in cardiac index were analysed separately due to collinearity.

| Variable                                                 | Model 1: Constant 1.20767 |         | Model 2: Constant 1.13718 |         |
|----------------------------------------------------------|---------------------------|---------|---------------------------|---------|
|                                                          | Coefficient               | p-value | Coefficient               | p-value |
| Change in systemic vascular resistance index during tilt | -                         | -       | -0.00003                  | 0.129   |
| Change in cardiac index during tilt                      | 0.08792                   | 0.001   | -                         | -       |
| Body mass index (kg/m <sup>2</sup> )                     | 0.00732                   | 0.005   | 0.00959                   | <0.001  |
| Age (years)                                              | 0.00747                   | <0.001  | 0.00748                   | <0.001  |
| Female sex                                               | -0.01925                  | 0.316   | -0.03086                  | 0.108   |
| Systolic blood pressure at rest (mmHg)                   | 0.00239                   | 0.023   | 0.00221                   | 0.029   |
| Diastolic blood pressure at rest (mmHg)                  | 0.00110                   | 0.420   | 0.00124                   | 0.362   |

The change in cardiac index and the change in systemic vascular resistance index were used as the main explanatory variables and in models 1 and 2, respectively. Both models have the same cofounders: BMI, age, sex and blood pressure. Lack of linearity in the data and collinearity between the changes in systemic vascular resistance index and cardiac index somewhat compromise this analysis.
